# Supplementary material for: Ionic liquid, glass or crystalline solid? Structures and thermal behaviour of (C4mim)2CuCl3
Source: Royal Society of Chemistry journal article supplement (doi:10.1039/c5dt03772g), 2016-01-01
Supplement: c5dt03772g1.pdf [file c5dt03772g1.pdf]

## Ionic Liquid, Glass or Crystalline Solid? Structures and Thermal Behaviour of $(C_4mim)_2CuCl_3$ .

Philipp Zürner, Horst Schmidt, Sebastian Bette, Jörg Wagler and Gero Frisch\*  
TU Bergakademie Freiberg, Institut für Anorganische Chemie, Leipziger Str. 29, 09599 Freiberg,  
Germany  
\*gero.frisch@chemie.tu-freiberg.de

### Supplementary information

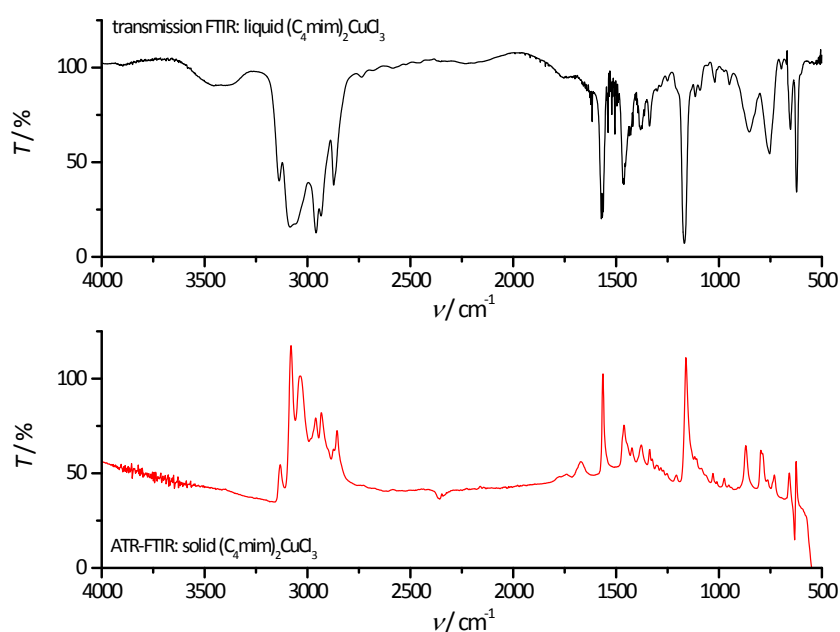

FTIR (transmission mode) of liquid and ATR-FTIR spectra of solid  $(C_4mim)_2CuCl_3$  at 298 K.

Rietveld refinement data at ambient temperature.

|                                  |       |
|----------------------------------|-------|
| $R\text{-}F^2$ /% *              | 1.801 |
| $gof$ /% *                       | 1.381 |
| Starting angle/ $^\circ 2\theta$ | 7.0   |
| Final angle/ $^\circ 2\theta$    | 60.0  |
| Step width/ $^\circ 2\theta$     | 0.023 |
| Time per step/ s                 | 0.2   |
| No. of variables                 | 32    |

\*  $R\text{-}F^2$  and  $gof$  as defined in TOPAS (Bruker AXS)<sup>1</sup>

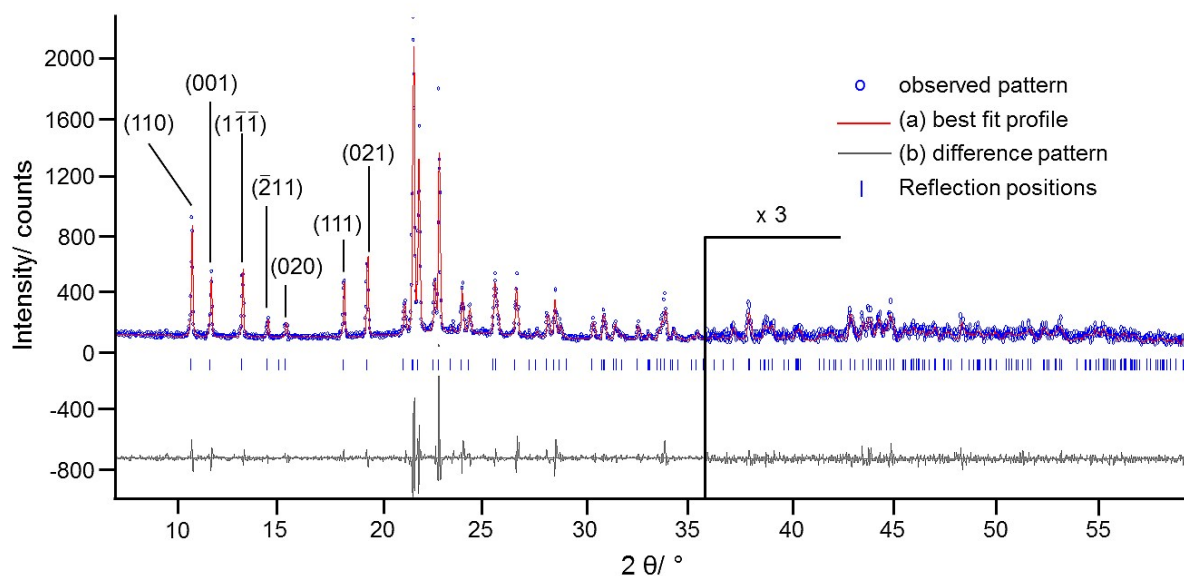

X-ray powder diffraction pattern of  $(C_4mim)_2CuCl_3$  (Cu- $K_\alpha$ ) at 298 K with selected reflection indices at ambient conditions compared to Rietveld fit profiles. The high angle part starting at  $36^\circ 2\theta$  is enlarged for clarity.

Crystallographic data and experimental details for the three solid  $(C_4mim)_2CuCl_3$  phases.

|                                                                            | high temperature phase                                             | intermediate temperature phase                                     | low temperature phase                                               |
|----------------------------------------------------------------------------|--------------------------------------------------------------------|--------------------------------------------------------------------|---------------------------------------------------------------------|
| <b>Crystal data</b>                                                        |                                                                    |                                                                    |                                                                     |
| Chemical formula                                                           | $C_{16}H_{30}Cl_3CuN_4$                                            |                                                                    |                                                                     |
| $M_r$                                                                      | 448.33                                                             |                                                                    |                                                                     |
| Crystal system, space group                                                | Monoclinic, $C2$                                                   | Monoclinic, $C2$                                                   | Monoclinic, $P2_1$                                                  |
| Temperature (K)                                                            | 233                                                                | 213                                                                | 90                                                                  |
| $a, b, c$ (Å)                                                              | 12.990 (6), 11.404 (4), 8.386 (4)                                  | 12.983 (4), 11.352 (3), 15.982 (5)                                 | 12.854 (2), 11.2524 (13), 15.806 (4)                                |
| $\beta$ (°)                                                                | 116.30 (3)                                                         | 110.11 (3)                                                         | 109.355 (16)                                                        |
| $V$ (Å <sup>3</sup> )                                                      | 1113.8 (9)                                                         | 2212.1 (12)                                                        | 2156.9 (7)                                                          |
| $Z$                                                                        | 2                                                                  | 4                                                                  | 4                                                                   |
| Radiation type                                                             | Mo $K\alpha$                                                       |                                                                    |                                                                     |
| $\mu$ (mm <sup>-1</sup> )                                                  | 1.35                                                               | 1.36                                                               | 1.39                                                                |
| Crystal size (mm)                                                          | 0.3 × 0.2 × 0.1                                                    |                                                                    |                                                                     |
| <b>Data collection</b>                                                     |                                                                    |                                                                    |                                                                     |
| Diffractometer                                                             | STOE <i>IPDS</i> 2 diffractometer                                  |                                                                    |                                                                     |
| Absorption correction                                                      | Integration <sup>2</sup>                                           |                                                                    |                                                                     |
| $T_{min}, T_{max}$                                                         | 0.803, 0.914                                                       | 0.720, 0.797                                                       | 0.645, 0.760                                                        |
| No. of measured, independent and observed [ $I > 2\sigma(I)$ ] reflections | 3438, 2170, 1853                                                   | 6529, 3932, 2931                                                   | 19229, 8389, 7844                                                   |
| $R_{int}$                                                                  | 0.036                                                              | 0.042                                                              | 0.037                                                               |
| $(\sin \theta/\lambda)_{max}$ (Å <sup>-1</sup> )                           | 0.633                                                              | 0.633                                                              | 0.633                                                               |
| <b>Refinement</b>                                                          |                                                                    |                                                                    |                                                                     |
| $R[F^2 > 2\sigma(F^2)], wR(F^2), S$                                        | 0.048, 0.111, 1.04                                                 | 0.048, 0.131, 1.14                                                 | 0.033, 0.084, 1.05                                                  |
| No. of reflections                                                         | 2170                                                               | 3932                                                               | 8387                                                                |
| No. of parameters                                                          | 145                                                                | 280                                                                | 479                                                                 |
| No. of restraints                                                          | 57                                                                 | 127                                                                | 37                                                                  |
| H-atom treatment                                                           | H-atom parameters constrained                                      |                                                                    |                                                                     |
| $\Delta\rho_{max}, \Delta\rho_{min}$ (e Å <sup>-3</sup> )                  | 0.36, -0.28                                                        | 0.30, -0.34                                                        | 0.58, -0.35                                                         |
| Absolute structure                                                         | Flack x determined using 694 quotients $[(I+)-(I-)]/[(I+)+(I-)]^3$ | Flack x determined using 890 quotients $[(I+)-(I-)]/[(I+)+(I-)]^3$ | Flack x determined using 3140 quotients $[(I+)-(I-)]/[(I+)+(I-)]^3$ |
| Absolute structure parameter                                               | 0.00 (2)                                                           | -0.001 (16)                                                        | -0.014 (7)                                                          |

Comparison of *measured* and calculated atom positions from the intermediate and low temperature crystal structure based on the high temperature phase. For clarification all hydrogen atoms and the carbon atoms of the butyl residue are omitted from the calculation.

| C 1 2 1 |            | $a = 12.990(6) \text{ \AA}, b = 11.404(4) \text{ \AA}, c = 8.386(4) \text{ \AA}, \beta = 116.30(3)^\circ, V = 1113.8(9) \text{ \AA}^3, Z = 2$ |        |        |        |       |            |           |        |        |        |
|---------|------------|-----------------------------------------------------------------------------------------------------------------------------------------------|--------|--------|--------|-------|------------|-----------|--------|--------|--------|
| Atom    | Wyck. Pos. | Site Sym.                                                                                                                                     | x      | y      | z      | Atom  | Wyck. Pos. | Site Sym. | x      | y      | z      |
| Cu (a)  | 2a         | 2                                                                                                                                             | 1.0000 | 0.5571 | 0.0000 | C (a) | 4c         | 1         | 0.2053 | 0.8217 | 0.2967 |
| Cl (a)  | 4c         | 1                                                                                                                                             | 0.9605 | 0.6633 | 0.1930 | C (b) | 4c         | 1         | 0.3463 | 0.9033 | 0.5215 |
| Cl (b)  | 2a         | 2                                                                                                                                             | 1.0000 | 0.3625 | 0.0000 | C (c) | 4c         | 1         | 0.3453 | 0.9477 | 0.3739 |
| N (a)   | 4c         | 1                                                                                                                                             | 0.2569 | 0.8265 | 0.4722 | C (d) | 4c         | 1         | 0.2269 | 0.7575 | 0.5941 |
| N (b)   | 4c         | 1                                                                                                                                             | 0.2565 | 0.8949 | 0.2331 |       |            |           |        |        |        |

|                  |    |    |   |     |
|------------------|----|----|---|-----|
| $i 2 \downarrow$ | -1 | 0  | 1 | 0   |
|                  | 0  | -1 | 0 | 0   |
|                  | 0  | 0  | 2 | 0.5 |
|                  | 0  | 0  | 0 | 1   |

| C 1 2 1 |            | $a = 12.990 \text{ \AA}, b = 11.404 \text{ \AA}, c = 16.031 \text{ \AA}, \beta = 110.290^\circ$<br>$a = 12.983(4) \text{ \AA}, b = 11.352(3) \text{ \AA}, c = 15.982(5) \text{ \AA}, \beta = 110.11(3)^\circ, V = 2212.1(12) \text{ \AA}^3, Z = 4$ |        |        |        |        |            |           |        |        |        |
|---------|------------|----------------------------------------------------------------------------------------------------------------------------------------------------------------------------------------------------------------------------------------------------|--------|--------|--------|--------|------------|-----------|--------|--------|--------|
| Atom    | Wyck. Pos. | Site Sym.                                                                                                                                                                                                                                          | x      | y      | z      | Atom   | Wyck. Pos. | Site Sym. | x      | y      | z      |
| Cu (a1) | 4c         | 1                                                                                                                                                                                                                                                  | 0.7500 | 0.4429 | 0.7500 | C (a1) | 4c         | 1         | 0.6931 | 0.1783 | 0.8984 |
| Cu (1)  |            |                                                                                                                                                                                                                                                    | 0.7439 | 0.4429 | 0.7485 | C (9)  |            |           | 0.6909 | 0.1809 | 0.8989 |
| Cl (a1) | 4c         | 1                                                                                                                                                                                                                                                  | 0.8860 | 0.3367 | 0.8465 | C (a2) | 4c         | 1         | 0.8070 | 0.1783 | 0.6017 |
| Cl (3)  |            |                                                                                                                                                                                                                                                    | 0.8830 | 0.3403 | 0.8452 | C (1)  |            |           | 0.8047 | 0.1752 | 0.6045 |
| Cl (a2) | 4c         | 1                                                                                                                                                                                                                                                  | 0.6140 | 0.3367 | 0.6535 | C (b1) | 4c         | 1         | 0.6645 | 0.0967 | 0.0108 |
| Cl (2)  |            |                                                                                                                                                                                                                                                    | 0.6104 | 0.3325 | 0.6532 | C (10) |            |           | 0.6723 | 0.0906 | 0.0131 |
| Cl (b1) | 4c         | 1                                                                                                                                                                                                                                                  | 0.7500 | 0.6375 | 0.7500 | C (b2) | 4c         | 1         | 0.8356 | 0.0967 | 0.4893 |
| Cl (1)  |            |                                                                                                                                                                                                                                                    | 0.7351 | 0.6379 | 0.7467 | C (2)  |            |           | 0.8419 | 0.1005 | 0.4921 |
| N (a1)  | 4c         | 1                                                                                                                                                                                                                                                  | 0.7292 | 0.1735 | 0.9861 | C (c1) | 4c         | 1         | 0.5917 | 0.0523 | 0.9370 |
| N (3)   |            |                                                                                                                                                                                                                                                    | 0.7337 | 0.1702 | 0.9876 | C (11) |            |           | 0.5933 | 0.0514 | 0.9405 |
| N (a2)  | 4c         | 1                                                                                                                                                                                                                                                  | 0.7708 | 0.1735 | 0.5139 | C (c2) | 4c         | 1         | 0.9084 | 0.0523 | 0.5631 |
| N (1)   |            |                                                                                                                                                                                                                                                    | 0.7756 | 0.1763 | 0.5161 | C (3)  |            |           | 0.9107 | 0.0520 | 0.5663 |
| N (b1)  | 4c         | 1                                                                                                                                                                                                                                                  | 0.6101 | 0.1051 | 0.8666 | C (d1) | 4c         | 1         | 0.8202 | 0.2425 | 0.0471 |
| N (4)   |            |                                                                                                                                                                                                                                                    | 0.6055 | 0.1101 | 0.8695 | C (12) |            |           | 0.8300 | 0.2319 | 0.0458 |
| N (b2)  | 4c         | 1                                                                                                                                                                                                                                                  | 0.8900 | 0.1051 | 0.6335 | C (d2) | 4c         | 1         | 0.6799 | 0.2425 | 0.4530 |
| N (2)   |            |                                                                                                                                                                                                                                                    | 0.8866 | 0.1001 | 0.6365 | C (4)  |            |           | 0.6898 | 0.2505 | 0.4558 |

|                  |   |   |   |      |
|------------------|---|---|---|------|
| $k 2 \downarrow$ | 1 | 0 | 0 | 0.25 |
|                  |   |   |   |      |

|   |   |   |   |
|---|---|---|---|
| 0 | 1 | 0 | 0 |
| 0 | 0 | 1 | 0 |
| 0 | 0 | 0 | 1 |

| P 1 2, 1           |            | Nr. 4     |                   | a = 12.990Å, b = 11.404Å, c = 16.031Å, β = 110.290°<br>a = 12.854(2) Å, b = 11.2524(13) Å, c = 15.806(4) Å, θ = 109.355(16)°, V = 2156.9(7) Å³, Z = 4 |                  |                   |            |           |                  |                  |                  |
|--------------------|------------|-----------|-------------------|-------------------------------------------------------------------------------------------------------------------------------------------------------|------------------|-------------------|------------|-----------|------------------|------------------|------------------|
| Atom               | Wyck. Pos. | Site Sym. | x                 | y                                                                                                                                                     | z                | Atom              | Wyck. Pos. | Site Sym. | x                | y                | z                |
| Cu (a11)<br>Cu (1) | 2a         | 1         | 0.5000<br>0.4984  | 0.4429<br>0.4494                                                                                                                                      | 0.7500<br>0.7528 | C (a11)<br>C (25) | 2a         | 1         | 0.4431<br>0.4242 | 0.1783<br>0.2015 | 0.8984<br>0.9026 |
| Cu (a21)<br>Cu (2) | 2a         | 1         | 0.0000<br>0.0204  | 0.4429<br>0.4418                                                                                                                                      | 0.2500<br>0.2587 | C (a12)<br>C (1)  | 2a         | 1         | 0.0570<br>0.0416 | 0.1783<br>0.1629 | 0.1017<br>0.1028 |
| Cl (a11)<br>Cl (1) | 2a         | 1         | 0.6360<br>0.6309  | 0.3367<br>0.3408                                                                                                                                      | 0.8465<br>0.8525 | C (a21)<br>C (9)  | 2a         | 1         | 0.5570<br>0.5362 | 0.1783<br>0.1625 | 0.6017<br>0.6094 |
| Cl (a12)<br>Cl (5) | 2a         | 1         | 0.8640<br>0.8696  | 0.3367<br>0.3489                                                                                                                                      | 0.1535<br>0.1633 | C (a22)<br>C (17) | 2a         | 1         | 0.9431<br>0.9251 | 0.1783<br>0.2022 | 0.3984<br>0.3969 |
| Cl (a21)<br>Cl (2) | 2a         | 1         | 0.3640<br>0.3551  | 0.3367<br>0.3412                                                                                                                                      | 0.6535<br>0.6642 | C (b11)<br>C (26) | 2a         | 1         | 0.4145<br>0.4141 | 0.0967<br>0.0980 | 0.0108<br>0.0182 |
| Cl (a22)<br>Cl (4) | 2a         | 1         | 0.1360<br>0.1428  | 0.3367<br>0.3256                                                                                                                                      | 0.3465<br>0.3587 | C (b12)<br>C (2)  | 2a         | 1         | 0.0856<br>0.0583 | 0.0967<br>0.0686 | 0.9893<br>0.9856 |
| Cl (b11)<br>Cl (3) | 2a         | 1         | 0.5000<br>0.4952  | 0.6375<br>0.6470                                                                                                                                      | 0.7500<br>0.7428 | C (b21)<br>C (10) | 2a         | 1         | 0.5856<br>0.5863 | 0.0967<br>0.0997 | 0.4893<br>0.4969 |
| Cl (b12)<br>Cl (6) | 2a         | 1         | 0.0000<br>0.0401  | 0.6375<br>0.6378                                                                                                                                      | 0.2500<br>0.2518 | C (b22)<br>C (18) | 2a         | 1         | 0.9145<br>0.8949 | 0.0967<br>0.1176 | 0.5108<br>0.5125 |
| N (a11)<br>N (7)   | 2a         | 1         | 0.4792<br>0.4711  | 0.1735<br>0.1852                                                                                                                                      | 0.9861<br>0.9910 | C (c11)<br>C (27) | 2a         | 1         | 0.3417<br>0.3309 | 0.0523<br>0.0622 | 0.9370<br>0.9445 |
| N (a12)<br>N (1)   | 2a         | 1         | 0.0208<br>-0.0039 | 0.1735<br>0.1486                                                                                                                                      | 0.0139<br>0.0141 | C (c12)<br>C (3)  | 2a         | 1         | 0.1584<br>0.1431 | 0.0523<br>0.0344 | 0.0631<br>0.0591 |
| N (a21)<br>N (3)   | 2a         | 1         | 0.5208<br>0.5126  | 0.1735<br>0.1690                                                                                                                                      | 0.5139<br>0.5207 | C (c21)<br>C (11) | 2a         | 1         | 0.6584<br>0.6549 | 0.0523<br>0.0513 | 0.5631<br>0.5729 |
| N (a22)<br>N (6)   | 2a         | 1         | 0.9792<br>0.9556  | 0.1735<br>0.2025                                                                                                                                      | 0.4861<br>0.4863 | C (c22)<br>C (19) | 2a         | 1         | 0.8417<br>0.8281 | 0.0523<br>0.0659 | 0.4370<br>0.4371 |
| N (b11)<br>N (8)   | 2a         | 1         | 0.3601<br>0.3384  | 0.1051<br>0.1282                                                                                                                                      | 0.8666<br>0.8734 | C (d11)<br>C (28) | 2a         | 1         | 0.5702<br>0.5707 | 0.2425<br>0.2444 | 0.0471<br>0.0488 |
| N (b12)<br>N (2)   | 2a         | 1         | 0.1400<br>0.1310  | 0.1051<br>0.0947                                                                                                                                      | 0.1335<br>0.1314 | C (d12)<br>C (4)  | 2a         | 1         | 0.9299<br>0.8939 | 0.2425<br>0.2054 | 0.9530<br>0.9579 |
| N (b21)<br>N (4)   | 2a         | 1         | 0.6400<br>0.6217  | 0.1051<br>0.0907                                                                                                                                      | 0.6335<br>0.6428 | C (d21)<br>C (12) | 2a         | 1         | 0.4299<br>0.4264 | 0.2425<br>0.2425 | 0.4530<br>0.4597 |
| N (b22)<br>N (5)   | 2a         | 1         | 0.8601<br>0.8473  | 0.1051<br>0.1205                                                                                                                                      | 0.3666<br>0.3655 | C (d22)<br>C (20) | 2a         | 1         | 0.0702<br>0.0375 | 0.2425<br>0.2814 | 0.5471<br>0.5470 |

## References

- 1 Bruker AXS Topas, version 4.2. 2009.
- 2 P. Coppens, *Crystallographic Computing*, edited by F. R. Ahmed, S. R. Hall & C. P. Huber, Copenhagen: Munksggard, 1970, p. 255–270.
- 3 S. Parsons, H. D. Flack, T. Wagner, *Acta Crystallogr. Sect. B*, 2013, **69**, 249.
